# Supplementary material for: Sense of coherence and its relationship to participation, cancer-related fatigue, symptom burden, and quality of life in women with breast cancer participating in the OptiTrain exercise trial
Source: PubMed Central journal article supplement (PMC7546973; doi:10.1007/s00520-020-05378-0), 2020-03-05
Supplement: 520_2020_5378_MOESM1_ESM.pdf [file 520_2020_5378_MOESM1_ESM.pdf]

**Title Manuscript:** Sense of coherence and its relationship to participation, cancer-related fatigue, symptom burden and quality of life in women with breast cancer participating in the OptiTrain exercise trial

Anouk E Hiensch<sup>\*1</sup>, Kate A Bolam<sup>2,3</sup>, Sara Mijwel<sup>2,4</sup>, Anne M May<sup>1</sup>, Yvonne Wengström<sup>2,5</sup>

<sup>1</sup>Julius Center for Health Sciences and Primary Care, University Medical Center Utrecht, PO Box 85500, STR 6.131, 3508 GA Utrecht, The Netherlands.

<sup>2</sup>Department of Neurobiology, Care Sciences and Society, Division of Nursing, Karolinska Institutet, Karolinska University Hospital, 141 83 Huddinge, Stockholm, Sweden.

<sup>3</sup>School of Human Movement and Nutrition Sciences, The University of Queensland, Brisbane, Australia.

<sup>4</sup>Department of Physiology and Pharmacology, Karolinska Institutet, Stockholm, Sweden.

<sup>5</sup>Theme Cancer, Karolinska University Hospital, Stockholm, Sweden.

\* Corresponding author: A.E. Hiensch, Julius Center for Health Sciences and Primary Care, University Medical Center Utrecht, Julius Centrum, PO Box 85500, STR 6.131, 3508 GA Utrecht, The Netherlands. Tel: +31(0)88 75 677 08, Email: a.e.hiensch-2@umcutrecht.nl, (ORCID: 0000-0002-6216-2609)

*Journal of Supportive Care in Cancer*

**Patients assessed for eligibility** ( $n = 863$ )

**Excluded before randomization** ( $n = 623$ )

- Non-eligible ( $n = 240$ )
- Travel distance too far ( $n = 100$ )
- Too time consuming ( $n = 54$ )
- Too late to be included ( $n = 11$ )
- Other/unknown ( $n = 218$ )

**Patients randomized** ( $n = 240$ )

**Allocation**

**Allocation**

**Participants allocated to combined aerobic and resistance training (RT-HIIT)** ( $n = 79$ )

**Participants allocated to aerobic training (AT-HIIT)** ( $n = 80$ )

**Participants allocated to usual care (UC)** ( $n = 81$ )

**Follow-up**

**Follow-up**

**Follow-up during 16-week intervention period**

- Intervention drop-out ( $n = 11$ )
- Study drop-out ( $n = 10$ )
- Long-absence ( $n = 14$ )
- Drop-out before baseline ( $n = 4$ )
  - Survey completed ( $n = 1$ )

**Follow-up during 16-week intervention period**

- Intervention drop-out ( $n = 14$ )
- Study drop-out ( $n = 11$ )
- Long-absence ( $n = 7$ )
- Drop-out before baseline ( $n = 8$ )
  - Survey completed ( $n = 0$ )

**Follow-up during 16-week intervention period**

- Study drop-out ( $n = 3$ )
- Drop-out before baseline ( $n = 18$ )
  - Survey completed ( $n = 3$ )

**Analysis**

**Analysis**

**Participants allocated to the RT-HIIT-group who completed baseline assessments ( $n = 74$ ) and the follow-up assessments ( $n = 65$ )**

- Weak-normal SOC ( $n = 41$ )
- Strong SOC ( $n = 33$ )

**Participants allocated to the AT-HIIT-group who completed baseline assessments ( $n = 72$ ) and the follow-up assessments ( $n = 60$ )**

- Weak-normal SOC ( $n = 42$ )
- Strong SOC ( $n = 30$ )

**Participants allocated to the UC-group who completed the trial baseline assessments ( $n = 60$ ) and follow-up assessments ( $n = 57$ )**

- Weak-normal SOC ( $n = 42$ )
- Strong SOC ( $n = 18$ )
